# Supplementary material
Source: HighWire-hosted journal article supplement (http://bmjopenquality.bmj.com/highwire/filestream/147470/field_highwire_adjunct_files/0/bmjqs-2012-001159_press_release.pdf)
Supplement: bmjqs-2012-001159_press_release.pdf [file bmjqs-2012-001159_press_release.pdf]

| NEW ADMISSIONS        |            |     |                |     |      |            |                                                   |                                             |                                   |                                                        |
|-----------------------|------------|-----|----------------|-----|------|------------|---------------------------------------------------|---------------------------------------------|-----------------------------------|--------------------------------------------------------|
| Name                  | Hospital # | Age | Admission Date | MHA | Ward | Background | Recovery pathway documentation completed (yes/no) | If not completed reason documented          | Capacity to consent done (yes/no) | Bloods, Physicals, ECG done? If not what is left to do |
|                       |            |     |                |     |      |            |                                                   |                                             |                                   |                                                        |
| WARD JOBS             |            |     |                |     |      |            |                                                   |                                             |                                   |                                                        |
| Name                  | Hospital # | Age | Admission Date | MHA | Ward | Background | Task and Plan based on results                    | Job completed, or reason for non completion |                                   |                                                        |
|                       |            |     |                |     |      |            |                                                   |                                             |                                   |                                                        |
| SECLUSION             |            |     |                |     |      |            |                                                   |                                             |                                   |                                                        |
|                       |            |     |                |     |      |            |                                                   |                                             |                                   |                                                        |
| SECTION 136           |            |     |                |     |      |            |                                                   |                                             |                                   |                                                        |
|                       |            |     |                |     |      |            |                                                   |                                             |                                   |                                                        |
| A&E                   |            |     |                |     |      |            |                                                   |                                             |                                   |                                                        |
| CAMHS A&E ASSESSMENTS |            |     |                |     |      |            |                                                   |                                             |                                   |                                                        |
|                       |            |     |                |     |      |            |                                                   |                                             |                                   |                                                        |
| Adult A&E ASSESSMENTS |            |     |                |     |      |            |                                                   |                                             |                                   |                                                        |
